# Supplementary material
Source: HighWire-hosted journal article supplement (https://heart.bmj.com/content/103/3/235)
Supplement: inline-supplementary-material-1 [file inline-supplementary-material-1.pdf]

**Table S1** Diagnostic codes for cardiovascular disorders

|                      | International Classification of Diseases, 9 <sup>th</sup> revision<br>(before 2006) | International Classification of Diseases, 10 <sup>th</sup> revision<br>(beginning in 2006) |
|----------------------|-------------------------------------------------------------------------------------|--------------------------------------------------------------------------------------------|
| Cardiovascular       | 401-445, 447-453                                                                    | I10-I82                                                                                    |
| Heart                |                                                                                     |                                                                                            |
| Heart failure        | 428                                                                                 | I50                                                                                        |
| Ischemia             | 410-414                                                                             | I20-I25                                                                                    |
| Infarction           | 410, 411.0, 412                                                                     | I21-I23, I25.2                                                                             |
| Angina               | 413                                                                                 | I20                                                                                        |
| Arrest               | 427.5                                                                               | I46                                                                                        |
| Inflammation         | 420-422                                                                             | I30, I33, I40                                                                              |
| Conduction           | 426-427.4, 427.6-427.9                                                              | I44-I45, I47-I49                                                                           |
| Valve                | 424                                                                                 | I34-I39                                                                                    |
| Cardiomyopathy       | 425                                                                                 | I42-I43                                                                                    |
| Any                  | 402, 404, 410-429                                                                   | I11, I13, I20-I51                                                                          |
| Pulmonary            |                                                                                     |                                                                                            |
| Embolism             | 415.1                                                                               | I26                                                                                        |
| Other                | 415.0, 416-417                                                                      | I27-I28                                                                                    |
| Any                  | 415-417                                                                             | I26-I28                                                                                    |
| Cerebrovascular      |                                                                                     |                                                                                            |
| Ischemic stroke      | 433-437.2, 437.4-438                                                                | I63-I66.9, I67.2                                                                           |
| Hemorrhage           | 430-432                                                                             | I60-I62                                                                                    |
| Any                  | 430-437.2, 437.4-438                                                                | I60-I66.9, I67.2-I69                                                                       |
| Hypertension         | 401-405, 416.8, 437.2, 461.0                                                        | I10-I15, I27.0, I67.4                                                                      |
| Atherosclerosis      | 414.0, 414.3, 414.4, 429.2, 440                                                     | I25.0, I25.1, I70                                                                          |
| Aneurysm             | 437.3, 442, 443.2                                                                   | I67.0, I67.1, I72                                                                          |
| Aortic dissection    | 441                                                                                 | I71                                                                                        |
| Deep vein thrombosis | 451.1, 451.83, 453.4-453.5, 453.72,<br>453.82                                       | I80.1-I80.3                                                                                |

**Table S2** Procedure codes for cardiovascular interventions

|                                  | Canadian Classification of<br>Diagnostic, Therapeutic, and<br>Surgical Procedures<br>(before 2006) | Canadian Classification of<br>Health Interventions<br>(beginning in 2006) |
|----------------------------------|----------------------------------------------------------------------------------------------------|---------------------------------------------------------------------------|
| <b>Heart</b>                     |                                                                                                    |                                                                           |
| Angioplasty                      | 48.0                                                                                               | 1.IJ.50, 1.IJ.55, 1.IJ.57, 1.IJ.80                                        |
| Coronary artery<br>bypass graft  | 48.1-48.3                                                                                          | 1.IJ.76                                                                   |
| Cardiopulmonary<br>resuscitation | 13.63                                                                                              | 1.HZ.30                                                                   |
| Open heart<br>resuscitation      | 49.91                                                                                              | 1.HZ.09                                                                   |
| Pacemaker                        | 49.6-49.8                                                                                          | 1.HZ.53, 1.HZ.55, 1.HB.55,<br>1.HD.55, 1.HZ.38                            |
| Valve surgery                    | 47.0-47.3, 47.96, 47.97                                                                            | 1.HS, 1.HT, 1.HU, 1.HV,<br>1.HW, 1.HX<br>1.HA-1.HZ                        |
| Any                              | 47.0-49.9                                                                                          |                                                                           |
| <b>Vessel</b>                    |                                                                                                    |                                                                           |
| Angiography                      | 50.8                                                                                               | 3.ID.10                                                                   |
| Any surgery                      | 50.0-51.9                                                                                          | 1.IA-1.KZ                                                                 |
| Aorta surgery                    | 50.04, 50.14, 50.24, 50.34, 50.44,<br>50.54, 50.74                                                 | 1.IA, 1.IB, 1.IC, 1.ID, 1.IF,<br>1.KA                                     |
| Intracranial surgery             | 50.01, 50.11, 50.21, 50.31, 50.41,<br>50.51, 50.71, 51.51, 51.52                                   | 1.JW.50-1.JW.87                                                           |
